# Supplementary material for: Associations between environmental covariates and temporal changes in malaria incidence in high transmission settings of Uganda: a distributed lag nonlinear analysis
Source: PubMed Central journal article supplement (PMC8557030; doi:10.1186/s12889-021-11949-5), 2021-10-30

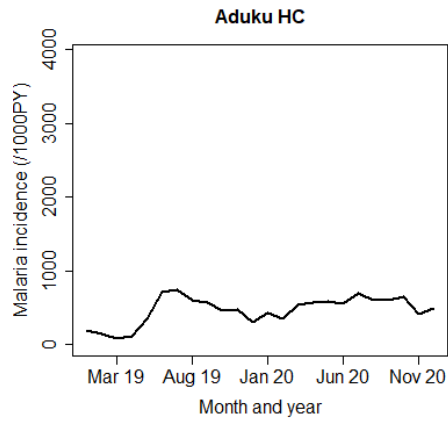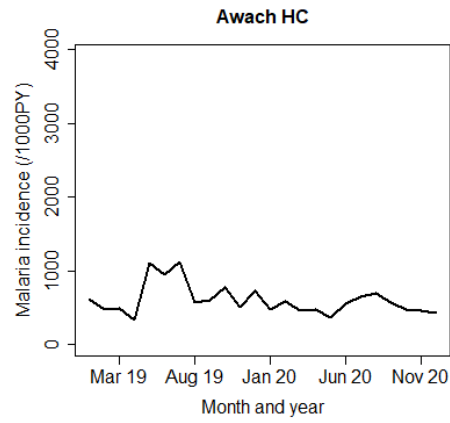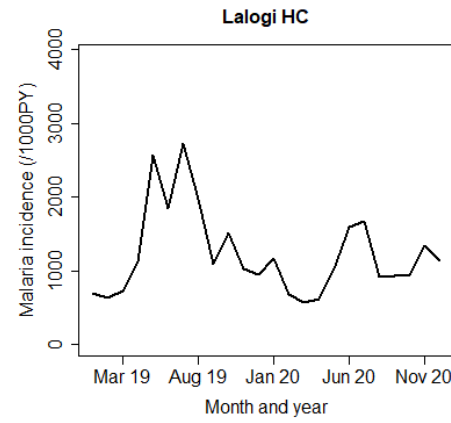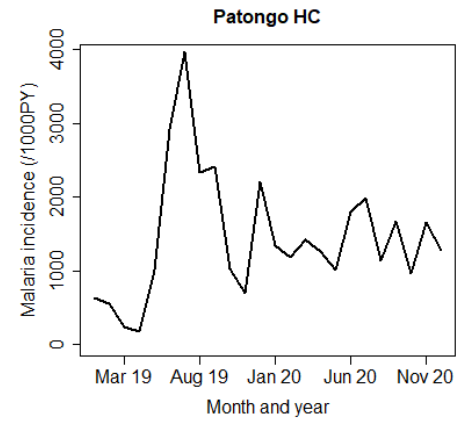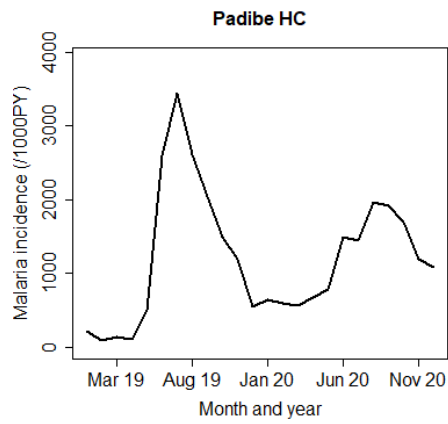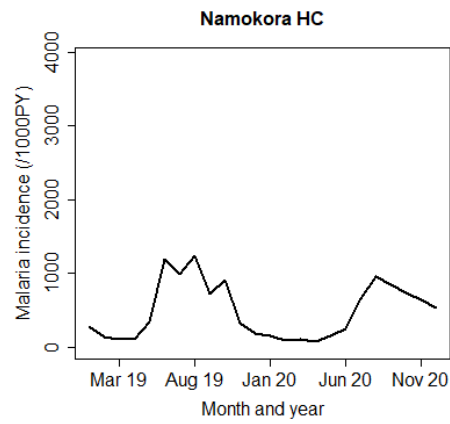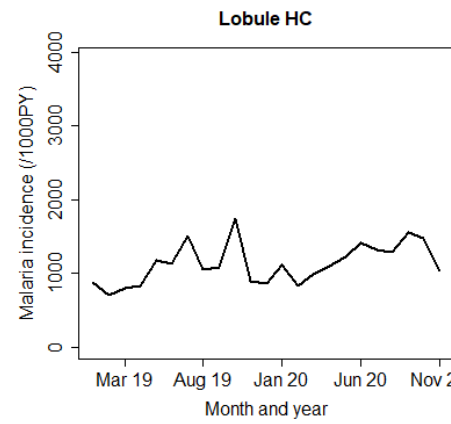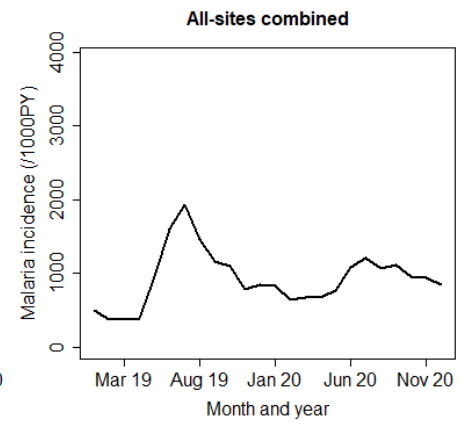

Supplement: 12889_2021_11949_MOESM3_ESM.pdf [file 12889_2021_11949_MOESM3_ESM.pdf]
